# Supplementary material
Source: MDPI journal article supplement (https://www.mdpi.com/2227-9040/10/10/419)
Supplement: s1 [file s1]

Archive with 1 entries (1 files):
- special-f5d2782c503c2da649e889a9848c203e-1665711947.pdf
